# Supplementary material
Source: Springer Nature journal article supplement (http://www.springermedizin.de/resource/supplementary/12933_2013_724_MOESM1_ESM.pdf/9538832)

## Identification

## Screening

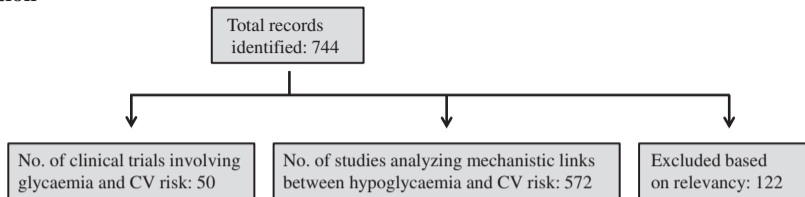

## Identification

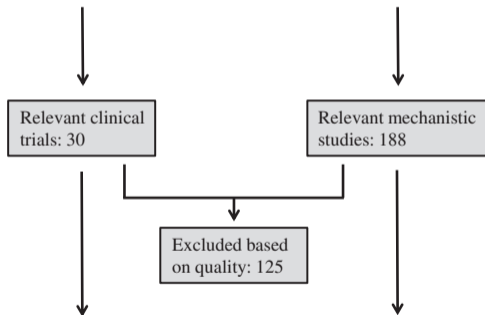

## Included

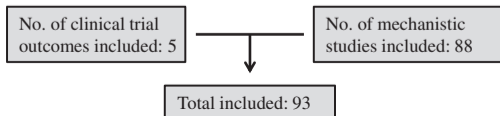

Supplement: MOESM1 [file 9538832]
